# Supplementary material
Source: HighWire-hosted journal article supplement (https://bmjopen.bmj.com/content/9/6/e024950)
Supplement: inline-supplementary-material-1 [file inline-supplementary-material-1.pdf]

## Supplementary Tables

Table 1 Characteristics of the studies included in the synthesis of evaluations (review 3)

| Author and year       | Self-care behaviour          | Whose behaviour | Context          | Intervention on Provider | Intervention                                      | Intervention behaviour change techniques (BCTs)                                                                   | Control condition       | Effectiveness <sup>1</sup>                                                              | Effect sizes                                                                                                                                                           |
|-----------------------|------------------------------|-----------------|------------------|--------------------------|---------------------------------------------------|-------------------------------------------------------------------------------------------------------------------|-------------------------|-----------------------------------------------------------------------------------------|------------------------------------------------------------------------------------------------------------------------------------------------------------------------|
| Everitt et al. (2006) | Management of conjunctivitis | Patients        | General practice | GP                       | <b>Education</b> (leaflet)                        | Instruction on how to perform the behaviour, Information about antecedents, Information about health consequences | No leaflet <sup>2</sup> | <b>Symptoms</b> [↓ <sub>NS</sub> ]                                                      | Severity of symptoms increased in the education group vs. control (mean difference adjusted for antibiotic group and eye swab = 0.1, 95% CI -0.2 to 0.3, p = 0.6, NS). |
|                       |                              |                 |                  |                          | <b>Prescribing strategy</b> (delayed antibiotics) | Behavioural substitution, Non-specific incentive                                                                  | No antibiotics          | <b>GP:</b> one effect in a favourable direction [↑+]; <b>Symptoms</b> : one effect in a | GP re-attendance was less in the delayed condition, vs. no antibiotics (odds ratio = 0.3, 95% CI 0.1 to 1.0)                                                           |

<sup>1</sup> Outcomes: consultation at GP, out-of-hours GP, or A&E; or symptoms. Effects: → = no difference, ↑+ = statistically significant favourable effect, ↑<sub>NS</sub> = favourable effect that did not obtain statistical significance, ↓+ = statistically significant effect, but unfavourable, or ↓<sub>NS</sub> = the effect was neither beneficial nor statistically significant.

<sup>2</sup> Adjusted for antibiotic group and eye swab.

|  |  |  |  |  |                                              |                                                      |                       |                                                                                                                                                 |                                                                                                                                                                                                                                                                    |
|--|--|--|--|--|----------------------------------------------|------------------------------------------------------|-----------------------|-------------------------------------------------------------------------------------------------------------------------------------------------|--------------------------------------------------------------------------------------------------------------------------------------------------------------------------------------------------------------------------------------------------------------------|
|  |  |  |  |  |                                              |                                                      |                       | favourable direction<br>[↑ <sub>NS</sub> ]                                                                                                      | Symptom reduction was greater in the delayed antibiotic prescribing vs. no antibiotics (mean difference = -0.1, 95% CI -0.4 to 0.2, p=0.4)                                                                                                                         |
|  |  |  |  |  | <b>Prescribing strategy</b> (No antibiotics) | <b>Prescribing strategy</b> Behavioural substitution | Immediate antibiotics | <b>GP:</b> one effect in a favourable direction [↑ <sub>NS</sub> ]<br><b>Symptoms</b> : one effect in a favourable direction [↓ <sub>NS</sub> ] | Re-attendance was less in the no antibiotics condition vs. in the immediate condition (odds ratio = 0.7, 95% CI 0.3 to 1.6).<br><br>Symptom reduction was less in the no antibiotics condition vs. in the immediate condition (mean difference = -0.2, 95% CI -0.5 |

|                      |                              |          |      |                    |                                                         |                                                                                                                   |            |                                                                                                                                                                                                                                                                                                                   |                                                                                                                                                                                                                                                                                                                                                                 |
|----------------------|------------------------------|----------|------|--------------------|---------------------------------------------------------|-------------------------------------------------------------------------------------------------------------------|------------|-------------------------------------------------------------------------------------------------------------------------------------------------------------------------------------------------------------------------------------------------------------------------------------------------------------------|-----------------------------------------------------------------------------------------------------------------------------------------------------------------------------------------------------------------------------------------------------------------------------------------------------------------------------------------------------------------|
|                      |                              |          |      |                    |                                                         |                                                                                                                   |            |                                                                                                                                                                                                                                                                                                                   | to 0.1 p=0.2, adjusted for patient information leaflet and eye swab).                                                                                                                                                                                                                                                                                           |
| Heaney et al. (2001) | Management of minor ailments | Patients | Home | Postal information | <b>Education</b> (information booklet on minor illness) | Instruction on how to perform the behaviour, Information about antecedents, Information about health consequences | Usual care | <b>GP sample:</b> two effects in an unfavourable direction [ $\downarrow\downarrow_{NS}$ ] and one effect in a favourable direction [ $\uparrow+$ ]<br><b>Out-of-hours sample:</b> two effects in an unfavourable direction [ $\downarrow\downarrow_{NS}$ ]; one effect in a favourable direction [ $\uparrow+$ ] | Among the GP sample, GP attendance was greater among education group vs. control (mean difference adjusted for baseline = 0.03, 95% CI -0.17 to 0.10 minor ailments only, and 0.14, 95% CI -0.18 to 0.45, overall; Out-of-hours attendance was lower in the education group (vs. control) (mean difference adjusted for baseline = -0.02, 95% CI -0.06 to 0.01) |

|  |  |  |  |  |  |  |  |                                                                                                                 |                                                                                                                                                                                                                                                                                                                                                                                  |
|--|--|--|--|--|--|--|--|-----------------------------------------------------------------------------------------------------------------|----------------------------------------------------------------------------------------------------------------------------------------------------------------------------------------------------------------------------------------------------------------------------------------------------------------------------------------------------------------------------------|
|  |  |  |  |  |  |  |  | <p><b>GP:</b> two effects in a favourable direction<br/> <math>\{ \uparrow \uparrow \uparrow \}_{NS}</math></p> | <p>Among the Out-of-hours sample GP attendance was greater in the education group vs. control (mean difference adjusted for baseline = 0.02, 95% CI -0.25 to 0.29 minor ailments only, and 0.22, 95% CI -0.31 to 0.75, overall; Out-of-hours attendance was lower in the education group (vs. control) (mean difference adjusted for baseline = -0.03, 95% CI -0.20 to 0.14)</p> |
|--|--|--|--|--|--|--|--|-----------------------------------------------------------------------------------------------------------------|----------------------------------------------------------------------------------------------------------------------------------------------------------------------------------------------------------------------------------------------------------------------------------------------------------------------------------------------------------------------------------|

|                       |                                                        |                                            |                  |    |                                                                                  |                                                                                                                                                                                   |            |                                                                           |                                                                                                         |
|-----------------------|--------------------------------------------------------|--------------------------------------------|------------------|----|----------------------------------------------------------------------------------|-----------------------------------------------------------------------------------------------------------------------------------------------------------------------------------|------------|---------------------------------------------------------------------------|---------------------------------------------------------------------------------------------------------|
| Francis et al. (2009) | Management of respiratory tract infections in children | Clinicians and parents in care of children | General practice | GP | <b>Education</b> (booklet on respiratory tract infections)                       | Credible source, Instruction on how to perform the behaviour, Information about antecedents, Information about health consequences, social support (unspecified), Problem solving | Usual care | <b>GP:</b> one effect in a favourable direction [ $\uparrow_{NS}$ ]       | Greater pain reduction in education group vs. control [mean difference = -3.8, 95% CI -7.7 to 0.1, NS]. |
| Little et al. (2001a) | Management of back pain                                | Patients                                   | General practice | GP | <b>Education</b> (booklet on back pain endorsed by GP and exercise) <sup>3</sup> | <b>Booklet group:</b> Instruction on how to perform the behaviour, Behavioural experiments, Problem solving, Credible source,                                                     | Usual care | <b>Symptoms:</b> one effect in a favourable direction [ $\uparrow_{NS}$ ] | Greater pain reduction in education group vs. control [mean difference = -3.8, 95% CI -7.7 to 0.1].     |

<sup>3</sup> Data for combined booklet and exercise group.

|                       |                              |          |      |                    |                                                   |                                                                                                                   |                                                                                                             |                                                                                            |                                                                                                                                                                                                                                                        |
|-----------------------|------------------------------|----------|------|--------------------|---------------------------------------------------|-------------------------------------------------------------------------------------------------------------------|-------------------------------------------------------------------------------------------------------------|--------------------------------------------------------------------------------------------|--------------------------------------------------------------------------------------------------------------------------------------------------------------------------------------------------------------------------------------------------------|
|                       |                              |          |      |                    |                                                   | Information about health consequences, Action planning                                                            |                                                                                                             |                                                                                            |                                                                                                                                                                                                                                                        |
| Little et al. (2001b) | Management of minor ailments | Patients | Home | Postal information | <b>Education (What should I do?)</b> <sup>4</sup> | Instruction on how to perform the behaviour, Information about antecedents, Information about health consequences | Patients received a one page leaflet giving the surgery times and how to contact the doctor in an emergency | <b>GP:</b> two effects in a favourable direction [ $\uparrow$ ; $\uparrow$ <sub>NS</sub> ] | Fewer patients in the education group attended the GP vs. control (odds ratios adjusted for baseline attendance and clustering at a practice level = 0.81, 95% CI 0.67 to 0.99) for minor ailments and for any condition = 0.92, 95% CI 0.72 to 1.16). |

<sup>4</sup> Summary card group not reported here.

|                     |                                                  |          |                  |    |                                                   |                                                                                                                                                                  |                       |                                                                                      |                                                                                                                                                             |
|---------------------|--------------------------------------------------|----------|------------------|----|---------------------------------------------------|------------------------------------------------------------------------------------------------------------------------------------------------------------------|-----------------------|--------------------------------------------------------------------------------------|-------------------------------------------------------------------------------------------------------------------------------------------------------------|
| Moore et al. (2009) | Management of lower respiratory tract infections | Patients | General practice | GP | <b>Education</b> (leaflet)                        | Instruction on how to perform the behaviour, Information about antecedents, Information about health consequences, Credible source, Social support (unspecified) | No leaflet            | <b>GP:</b> one effect in a unfavourable direction [ $\downarrow_{NS}$ ] <sup>5</sup> | Higher attendance rates for coughs among the education group vs. control (adjusted rate ratio = 1.27, 95% CI 0.86 to 1.87, p = 0.229, NS).                  |
|                     |                                                  |          |                  |    | <b>Prescribing strategy</b> (delayed antibiotics) | Behavioural substitution, Non-specific incentive                                                                                                                 | Immediate antibiotics | <b>GP:</b> one effect in a favourable direction [ $\uparrow+$ ] <sup>6</sup>         | Greater reduction in GP consultations in the delayed vs. immediate antibiotic strategy (adjusted incident rate ratio = 0.22, 95% CI 0.10 to 0.49, p<0.001). |

<sup>5</sup> Adjusted for past antibiotic exposure.

<sup>6</sup> Adjusted for past antibiotic exposure and education

|                      |                              |          |                  |                      |                                                     |                                                                                                                   |                       |                                                                                                                                                                          |                                                                                                                                                                                                                                        |
|----------------------|------------------------------|----------|------------------|----------------------|-----------------------------------------------------|-------------------------------------------------------------------------------------------------------------------|-----------------------|--------------------------------------------------------------------------------------------------------------------------------------------------------------------------|----------------------------------------------------------------------------------------------------------------------------------------------------------------------------------------------------------------------------------------|
|                      |                              |          |                  |                      | <b>Prescribing strategy</b> No antibiotics          | Behavioural substitution                                                                                          | Immediate antibiotics | <b>GP:</b> one effect in a favourable direction [ $\uparrow_{NS}$ ] <sup>7</sup>                                                                                         | Immediate antibiotics led to more GP consultations vs. no antibiotics (adjusted incident rate ratio = 0.66, 95% CI 0.30 to 1.44, p = 0.295, NS)                                                                                        |
| Platts et al. (2005) | Management of minor ailments | Patients | General practice | GP or practice nurse | <b>Education</b> (Healthwise Handbook) <sup>8</sup> | Instruction on how to perform the behaviour, Information about antecedents, Information about health consequences | Usual care            | <b>GP:</b> three effects in a favourable direction [ $\uparrow\uparrow\uparrow$ ] <sup>9</sup> ; three in an unfavourable direction [ $\downarrow\downarrow\downarrow$ ] | <p>Among males aged 16-34 and 60+ the annual mean GP consultations (AMCRs) were lower in the education group vs. control (16 to 34 = 2.89 vs. 3.10, NS; 60+ = 5.55 vs. 5.73)</p> <p>Among females aged 60+ AMCRs were lower in the</p> |

<sup>7</sup> Adjusted for past antibiotic exposure and education

<sup>8</sup> NHSd health booklet not reported here

<sup>9</sup> Statistical tests not reported for comparisons between healthwise handbook and usual care



|                       |                                          |                             |      |                |                                                          |                                                                                                      |            |                                                                                                |                                                                                                                                                                                                                                                                                                                               |
|-----------------------|------------------------------------------|-----------------------------|------|----------------|----------------------------------------------------------|------------------------------------------------------------------------------------------------------|------------|------------------------------------------------------------------------------------------------|-------------------------------------------------------------------------------------------------------------------------------------------------------------------------------------------------------------------------------------------------------------------------------------------------------------------------------|
|                       |                                          |                             |      |                |                                                          |                                                                                                      |            |                                                                                                | <p>education group (6.33) vs. control (7.41)</p> <p>Among females aged 16 to 34, AMCRs were higher in education group (5.30) vs. control (4.96)</p> <p>Among men and women aged 35 to 59 AMCRs were higher in the education group (4.24 for males and 5.40 for females) vs. control (4.11 for males and 5.06 for females)</p> |
| Robbins et al. (2003) | Management of minor ailments in children | Parents in care of children | Home | Research nurse | <b>Education</b> (booklet and visit from research nurse) | Instruction on how to perform the behaviour, Information about antecedents, Information about health | Usual care | <b>GP:</b> one effect showing no difference [→]; <b>Out-of-hours GP:</b> one effect showing no | No differences in consultation rate: GP, median = 2 for both education and control, IQR = 1, 4 GP, and 0, 4 control; out of                                                                                                                                                                                                   |

|                        |                                                                |          |                  |    |                                                     |                                                                                                                                               |                       |                                                                                                              |                                                                                                                                |
|------------------------|----------------------------------------------------------------|----------|------------------|----|-----------------------------------------------------|-----------------------------------------------------------------------------------------------------------------------------------------------|-----------------------|--------------------------------------------------------------------------------------------------------------|--------------------------------------------------------------------------------------------------------------------------------|
|                        |                                                                |          |                  |    |                                                     | consequences, Credible source                                                                                                                 |                       | difference [→]                                                                                               | hours GP, median = 0 for both groups, IQR = 0, 1 intervention, and 0, 1.5 control.                                             |
| Roberts et al. (2002)  | Management of lower back pain                                  | Patients | General practice | GP | <b>Education</b> (Back Home Leaflet endorsed by GP) | Instruction on how to perform the behaviour, Behavioural experiments, Problem solving, Credible source, Information about health consequences | Usual care            | <b>Symptoms</b> : one effect in a unfavourable direction [↓ <sub>NS</sub> ]                                  | Pain increased among education group vs. control (mean difference = 2.9, 95% CI -4.2 to 10.0, p = 0.363, NS)                   |
| Williams et al. (2006) | Management of middle-ear disease (acute otitis media/glue ear) | Patients | General practice | GP | <b>Prescribing strategy</b> : No antibiotics        | Pharmacological support                                                                                                                       | Immediate antibiotics | <b>GP</b> : one effect in a favourable direction [↑+] <sup>10</sup> ; one effect in a unfavourable direction | No antibiotics reduced the risk of re-attendance for Acute otitis media vs. immediate antibiotics (hazard ratio = 1.09, 95% CI |

<sup>10</sup> Acute otitis media sample

|                       |                              |                     |        |                                                          |                                        |                                                                                         |                |                                                       |                                                                                                                                                                                                                                                           |
|-----------------------|------------------------------|---------------------|--------|----------------------------------------------------------|----------------------------------------|-----------------------------------------------------------------------------------------|----------------|-------------------------------------------------------|-----------------------------------------------------------------------------------------------------------------------------------------------------------------------------------------------------------------------------------------------------------|
|                       |                              |                     |        |                                                          |                                        |                                                                                         |                | le direction<br>[↓+]¹¹                                | 1.07 to 1.10) and increased the risk of re-attendance for glue ear vs. immediate antibiotics (hazard ratio = 0.92, 95% CI 0.88 to 0.96) adjusting for age, sex, multiple deprivation index, ear, nose and throat referral, and high prescribing practice. |
| Yardley et al. (2010) | Management of minor ailments | University students | Online | Computer-generated advice (based on a complex algorithm) | <b>Education</b> (interactive website) | Instruction on how to perform the behaviour, Information about antecedents, Information | Static webpage | <b>GP:</b> one effect in a favourable direction [↑NS] | Online self-management advice resulted in fewer consultations than those in the control group (11 vs 21                                                                                                                                                   |

---

¹¹ Glue ear sample

|                             |                                 |          |                                  |           |                   |                                                                                   |                                                                                                          |                                                                                                                                                                                                                                          |                                                                                                                                                                                                                                                                                                                                       |
|-----------------------------|---------------------------------|----------|----------------------------------|-----------|-------------------|-----------------------------------------------------------------------------------|----------------------------------------------------------------------------------------------------------|------------------------------------------------------------------------------------------------------------------------------------------------------------------------------------------------------------------------------------------|---------------------------------------------------------------------------------------------------------------------------------------------------------------------------------------------------------------------------------------------------------------------------------------------------------------------------------------|
|                             |                                 |          |                                  |           |                   | about health<br>consequences,<br>Vicarious<br>consequences,<br>Credible<br>source |                                                                                                          |                                                                                                                                                                                                                                          | participants, $p = .22$ ).                                                                                                                                                                                                                                                                                                            |
| <b>Services</b>             |                                 |          |                                  |           |                   |                                                                                   |                                                                                                          |                                                                                                                                                                                                                                          |                                                                                                                                                                                                                                                                                                                                       |
| Chalder<br>et al.<br>(2003) | Management of<br>minor ailments | Patients | 10 walk-in<br>centres in England | Nurse led | Walk-in<br>centre | n/a                                                                               | A town of similar size, in the same region, but as distant as possible from any existing walk-in centre. | <b>GP:</b> one effect in a favourable direction [ $\uparrow_{NS}$ ]<br><b>Out-of-hours GP:</b> one effect in an unfavourable direction [ $\downarrow_{NS}$ ]<br><b>A&amp;E:</b> one effect in a favourable direction [ $\uparrow_{NS}$ ] | Fewer <i>GP</i> attendances in intervention vs control, (19.8 per 1,000 patients fewer, 95% CI -53.3 to 13.8).<br><br>Control practices had 0.38 fewer <i>monthly</i> Out-of-hours GP attendances per 1,000 patients, 95% CI -0.26 to 1.02).<br><br>Fewer A&E attendances in intervention vs. control group (difference in change per |

|                   |                              |          |                       |           |                |     |                                  |                                                                                                                                                                                                                                                                                     |                                                                                                                                                                                                                                                                                                                                                       |
|-------------------|------------------------------|----------|-----------------------|-----------|----------------|-----|----------------------------------|-------------------------------------------------------------------------------------------------------------------------------------------------------------------------------------------------------------------------------------------------------------------------------------|-------------------------------------------------------------------------------------------------------------------------------------------------------------------------------------------------------------------------------------------------------------------------------------------------------------------------------------------------------|
|                   |                              |          |                       |           |                |     |                                  |                                                                                                                                                                                                                                                                                     | month between groups = -175 per 1,000 patients, 95% CI -387 to 36, p=0.1)                                                                                                                                                                                                                                                                             |
| Hsu et al. (2003) | Management of minor ailments | Patients | Loughborough, England | Nurse led | Walk-in centre | n/a | Market Harborough (control town) | <p><b>GP:</b> one effect in a favourable direction [<math>\uparrow_{NS}</math>]</p> <p><b>Out-of-hours GP:</b> one effect in an unfavourable direction [<math>\downarrow_{NS}</math>]</p> <p><b>A&amp;E:</b> one effect in an unfavourable direction [<math>\downarrow+</math>]</p> | <p>-0.02 fewer <i>daily</i> emergency GP consultations per 1,000 patients in intervention vs control, 95% CI -0.75 to 0.71, in comparison with intervention sites, control practices had 0.07 fewer <i>daily</i> out of-hours consultations per 1,000 patients, 95% CI -0.06 to 0.19,</p> <p>10% increase in attendance rates at A&amp;E in towns</p> |

|                         |                              |          |                                                                                       |              |                               |     |                                           |                                                                                                                                                                |                                                                                                                                            |
|-------------------------|------------------------------|----------|---------------------------------------------------------------------------------------|--------------|-------------------------------|-----|-------------------------------------------|----------------------------------------------------------------------------------------------------------------------------------------------------------------|--------------------------------------------------------------------------------------------------------------------------------------------|
|                         |                              |          |                                                                                       |              |                               |     |                                           |                                                                                                                                                                | where NHS walk-in centres had been introduced, compared with control towns (adjusted rate ratio 1.10, 95% CI 1.00 to 1.21).                |
| Salisbury et al. (2007) | Management of minor ailments | Patients | Eight hospitals with co-located EDs and walk-in centres in England                    | Nurse led    | Walk-in centre                | n/a | Eight matched EDs without walk-in centres | <b>GP:</b> one effect in an unfavourable direction [ $\downarrow$ NS]<br><b>A&amp;E:</b> two effects in an unfavourable direction [ $\downarrow\downarrow$ NS] | re-consultations higher among participants in the intervention (86, 60.5%) than in the control (96, 56.3%; $p = 0.72$ ).                   |
| Chapman et al. (2002)   | Management of minor ailments | Patients | Amount of NHS Direct cover in UK (full, part, or none) during the winter of 1999-2000 | Not reported | Telephone triage (NHS Direct) | n/a | No cover                                  | <b>GP:</b> one effect in a favourable direction [ $\uparrow$ ]; one effect with no difference in size [ $\rightarrow$ ]                                        | no beneficial effects on the rates of respiratory GP consultations in England and Wales, across groups with different levels of NHS Direct |

|                        |                              |          |                                           |           |                  |     |                     |                                                                                                                                                                                                                |                                                                                                                                                                                                                                                                                                                                                                           |
|------------------------|------------------------------|----------|-------------------------------------------|-----------|------------------|-----|---------------------|----------------------------------------------------------------------------------------------------------------------------------------------------------------------------------------------------------------|---------------------------------------------------------------------------------------------------------------------------------------------------------------------------------------------------------------------------------------------------------------------------------------------------------------------------------------------------------------------------|
|                        |                              |          |                                           |           |                  |     |                     |                                                                                                                                                                                                                | coverage (statistics and effect sizes not reported).                                                                                                                                                                                                                                                                                                                      |
| Richards et al. (2002) | Management of minor ailments | Patients | Three primary care sites in York, England | Nurse led | Telephone triage | n/a | Standard management | <p><b>GP:</b> one effect in an unfavourable direction [↓+]</p> <p><b>Out-of-hours GP:</b> one effect in an unfavourable direction [↓+]</p> <p><b>A&amp;E:</b> one effect in an unfavourable direction [↓+]</p> | <p>nurse-led triage system returned for more practice-based care, (mean difference = 0.32, 95% CI 0.22 to 0.41, p=0.001) and out-of-hours practice care (mean difference = 0.04, 95% CI 0.01 to 0.07, p=0.005) than those in routine GP care</p> <p>nurse-led practice-based telephone triage system used more emergency care one month after the index consultation,</p> |

|                      |                              |          |                                                                   |                                                                      |                            |     |                                 |                                                                                                                                                                   |                                                                                                                                                                                                                                       |
|----------------------|------------------------------|----------|-------------------------------------------------------------------|----------------------------------------------------------------------|----------------------------|-----|---------------------------------|-------------------------------------------------------------------------------------------------------------------------------------------------------------------|---------------------------------------------------------------------------------------------------------------------------------------------------------------------------------------------------------------------------------------|
|                      |                              |          |                                                                   |                                                                      |                            |     |                                 |                                                                                                                                                                   | compared with those receiving routine GP care (mean difference: 0.023, 95% CI 0.015 to 0.032, $p<0.001$ ).                                                                                                                            |
| Turner et al. (2013) | Management of minor ailments | Patients | Durham and Darlington, Nottingham Luton and Lincolnshire, England | Non-clinical call handlers with clinical support from nurse advisors | Telephone triage (NHS 111) | n/a | Matched controls (geographical) | <b>Out-of-hours GP:</b> one effect in an unfavourable direction [ $\downarrow_{NS}$ ]<br><b>A&amp;E:</b> one effect in a favourable direction [ $\uparrow_{NS}$ ] | Greater out of hours GP attendances among NHS 111 pilot sites, vs. control sites (2.5% extra, 95% CI -3.5 to 8.5, NS)<br><br>Fewer A&E attendances per month in NHS 111 pilot sites vs. control sites (-0.1%, 95% CI -3.8 to 3.7, NS) |
| Butler et al. (2001) | Management of minor ailments | Patients | General practice in Cardiff, UK                                   | Nurse led                                                            | Practice nurse             | n/a | GP in same practice             | <b>GP:</b> one effect in an unfavourable direction [ $\downarrow_{NS}$ ]                                                                                          | Greater re-consultation in the nurse (16.9%) vs. GP (10%) group ( $p=0.91$ ).                                                                                                                                                         |



|                      |                              |          |                                                          |           |                |     |                                |                                                                                                                                                                                           |                                                                                                                                                                                                                                                                |
|----------------------|------------------------------|----------|----------------------------------------------------------|-----------|----------------|-----|--------------------------------|-------------------------------------------------------------------------------------------------------------------------------------------------------------------------------------------|----------------------------------------------------------------------------------------------------------------------------------------------------------------------------------------------------------------------------------------------------------------|
| Cox and Jones (2000) | Management of minor ailments | Patients | General practice in semi-rural area, England             | Nurse led | Practice nurse | n/a | Consulting GP in same practice | <p><b>GP:</b> one effect in an unfavourable direction [<math>\downarrow_{NS}</math>]</p> <p><b>Symptoms:</b> one effect in a favourable direction [<math>\uparrow+</math>]</p>            | <p>Greater re-consultation in the nurse (5%) vs. the GP group (3%) (rate difference = -0.021, 95% CI -0.069 to 0.019, p=0.288).</p> <p>Quicker symptom resolution among nurse vs. GP patients (median number of days = 4 for nurse and 5 for GP, p=0.016).</p> |
| Shum et al. (2000)   | Management of minor ailments | Patients | General practices in south east London and Kent, England | Nurse led | Practice nurse | n/a | GP in same practice            | <p><b>GP:</b> one effect in an unfavourable direction [<math>\downarrow_{NS}</math>]</p> <p><b>Out-of-hours GP:</b> one effect in a favourable direction [<math>\uparrow_{NS}</math>]</p> | <p>GP consultations/calls were higher in the nurse group (20.4%/0.9%) versus the GP group (18.2%/1.8%; p=0.340 and 0.218 for re/consultations/calls) as were</p>                                                                                               |

|              |                              |          |                                                      |           |           |     |                      |                                                                                                                                  |                                                                                                                                                                                                                                                                                                                    |
|--------------|------------------------------|----------|------------------------------------------------------|-----------|-----------|-----|----------------------|----------------------------------------------------------------------------------------------------------------------------------|--------------------------------------------------------------------------------------------------------------------------------------------------------------------------------------------------------------------------------------------------------------------------------------------------------------------|
|              |                              |          |                                                      |           |           |     |                      | <p><b>A&amp;E:</b> one effect in an unfavourable direction [↓NS]</p> <p><b>Symptoms</b> : one effect in an unclear direction</p> | <p>A&amp;E attendances (2.1% vs 2%, p&gt;0.999).</p> <p>Fewer GP out-of-hours calls among the nurse (0.9%) vs. the GP group (1.8%, NS)</p> <p>For symptoms a statistically insignificant odds ratio of 1.2 (95% confidence interval 0.8 to 1.8) was reported, though the direction of this effect was unclear.</p> |
| Mason (2007) | Management of minor ailments | Patients | Paramedic practitioner service in Sheffield, England | Paramedic | Paramedic | n/a | Standard 999 service | <p><b>A&amp;E:</b> one effect in a favourable direction [↑+]</p>                                                                 | Fewer A&E attendances in the intervention vs the control group                                                                                                                                                                                                                                                     |

|  |  |  |  |  |  |  |  |  |                                                    |
|--|--|--|--|--|--|--|--|--|----------------------------------------------------|
|  |  |  |  |  |  |  |  |  | (relative risk =<br>0.72, 95% CI<br>0.68 to 0.75). |
|--|--|--|--|--|--|--|--|--|----------------------------------------------------|

Table 2 BCTs identified in the interventions (with examples) and mapped onto the theoretical domains framework (TDF)

| Behavioural change technique (BCT)          | N of evaluations identified as present | Examples from descriptions of interventions                                                                                                                                                                                                                                                                                                                                                                 | Theoretical domains framework (TDF) |
|---------------------------------------------|----------------------------------------|-------------------------------------------------------------------------------------------------------------------------------------------------------------------------------------------------------------------------------------------------------------------------------------------------------------------------------------------------------------------------------------------------------------|-------------------------------------|
| <b>Education interventions</b>              |                                        |                                                                                                                                                                                                                                                                                                                                                                                                             |                                     |
| Instruction on how to perform the behaviour | 10                                     | It describes over 180 conditions organized in chapters by body areas and functions, together with home treatment.                                                                                                                                                                                                                                                                                           | Knowledge <sup>12</sup>             |
| Information about health consequences       | 10                                     | Walking helps most recovering backs.<br><br>The leaflet was simple, on one page, and included information about the natural history of LRTI.                                                                                                                                                                                                                                                                | Knowledge                           |
| Information about antecedents               | 8                                      | The booklet outlines 40 common health problems and provides information on when to consult a doctor.                                                                                                                                                                                                                                                                                                        | Knowledge                           |
| Credible source                             | 6                                      | The GPs in the experimental group also gave the patient a copy of the Back Home leaflet, verbally reinforcing the content: “This leaflet, called Back Home, gives you practical hints about how you can help to ease your back pain. Please read the leaflet carefully and use as many of the ideas as you can. This leaflet is important. It will allow you to be in control of your back pain.”           | Reinforcement                       |
| Problem solving                             | 3                                      | An active self-management approach to back pain, encouraging the patient to identify positions/movements that are painful (examples given: lifting with bent back, bending, slouching, pulling/pushing) and also to identify positions to try to ease back pain (examples given to try: lying on back with knees bent, on back with legs on sofa, lying on front, sitting on firm chair with back support). | Physical skills <sup>13</sup>       |

<sup>12</sup> Coded as knowledge (rather than training) as emphasis on advice rather than skills training.

<sup>13</sup> Not previously mapped. Chosen as influences physical skills to manage problem in behavioural context.

|                               |   |                                                                                                                                                                                                                                                                                                       |                             |
|-------------------------------|---|-------------------------------------------------------------------------------------------------------------------------------------------------------------------------------------------------------------------------------------------------------------------------------------------------------|-----------------------------|
| Social support (unspecified)  | 2 | The online training described the content and aims of the booklet, and encouraged its use within the consultation to facilitate the use of certain communication skills, mainly exploring the parent's main concerns, asking about their expectations, and discussing prognosis, treatment options... | Social influences           |
| Behavioural experiments       | 2 | There are interactive aspects, encouraging patients to list the movements or positions that increase their pain (listing movements that are comfortable or uncomfortable).                                                                                                                            | Physical skills             |
| Vicarious consequences        | 1 | ...and provided "vicarious learning" information about successful coping experiences of others who had used these self-care methods.                                                                                                                                                                  | Social influences           |
| Action planning               | 1 | ...take exercise as soon as back pain allowed, and to aim for regular exercise in the longer term (with a target of 20 minutes sufficient to bring about shortness of breath at least three times per week.                                                                                           | Goals                       |
| <b>Prescribing strategies</b> |   |                                                                                                                                                                                                                                                                                                       |                             |
| Behaviour substitution        | 3 | No antibiotics                                                                                                                                                                                                                                                                                        | Reinforcement <sup>14</sup> |
| Incentive <sup>15</sup>       | 2 | Delayed antibiotics (prescription to be collected from the surgery at the parents' or patients' discretion after three days).                                                                                                                                                                         | Reinforcement <sup>16</sup> |

<sup>14</sup> Not previously mapped. Coded here as reinforcement as it was assumed that it worked through weakening habitual visits to see a GP for non-minor symptoms and the need for antibiotic treatment.

<sup>15</sup> Relabelled to fit context (originally non-specific incentive).

<sup>16</sup> Not previously mapped. Coded here as reinforcement as it was assumed that it worked through weakening habitual visits to see a GP for non-minor symptoms and the need for antibiotic treatment.

Table 3 Choice of intervention functions

| <b>Candidate intervention functions</b> | <b>Suitability</b>                                                 |
|-----------------------------------------|--------------------------------------------------------------------|
| Education                               | Yes (but not alone, needs to be used in conjunction with training) |
| Persuasion                              | Yes                                                                |
| Incentivisation                         | Challenging to deliver in this context                             |
| Coercion                                | Not socially acceptable                                            |
| Training                                | Yes                                                                |
| Restriction                             | Yes                                                                |
| Environmental restructuring             | Yes (but longer term solutions require structural change)          |
| Modelling                               | Challenging to deliver in this context                             |
| Enablement                              | Yes                                                                |
